# Supplementary material
Source: PubMed Central journal article supplement (PMC4756438)
Supplement: NIHMS67067-supplement-SI.pdf [file NIHMS67067-supplement-SI.pdf]

## Supporting Information

**Comparison of  $^{64}\text{Cu}$ -complexing bifunctional chelators for radioimmunoconjugation: labeling efficiency, specific activity and *in vitro/in vivo* stability.**

Maggie S. Cooper <sup>‡\*</sup>, Michelle T. Ma <sup>†</sup>, Kavitha Sunassee <sup>‡</sup>, Karen P. Shaw <sup>‡</sup>, Jennifer D. Williams <sup>‡</sup>, Rowena L. Paul <sup>‡</sup>, Paul S. Donnelly <sup>†</sup>, Philip J. Blower <sup>‡</sup>

<sup>‡</sup> King's College London, Division of Imaging Sciences and Biomedical Engineering, 4<sup>th</sup> Floor Lambeth Wing, St. Thomas' Hospital, SE1 7EH, London

<sup>†</sup> School of Chemistry and Bio21 Molecular Science and Biotechnology Institute, University of Melbourne, Parkville, Melbourne, Victoria, 3010, Australia

Corresponding Author:

\*King's College London

Division of Imaging Sciences and Biomedical Engineering

4<sup>th</sup> Floor Lambeth Wing

St. Thomas' Hospital

London, UK

SE1 7EH

Phone: +44 (0)20 7188 8376

E-mail: Margaret.s.cooper@kcl.ac.uk

| Bifunctional chelator     | Concentration of Rituximab |              |              |              |              |
|---------------------------|----------------------------|--------------|--------------|--------------|--------------|
|                           | 500 nM                     | 250 nM       | 125 nM       | 62.5 nM      | 31.3 nM      |
| <i>p</i> -SCN-Bn-DOTA     | 98.7 (± 0.1)               | 96.3 (± 1.3) | 64.5 (± 4.1) | 19.6 (±14.6) | 1.4 (± 1.0)  |
| <i>p</i> -SCN-Bn-NOTA     | 99.4 (± 0.1)               | 99.4 (± 0.2) | 99.2 (± 0.2) | 99.4 (± 0.5) | 95.2 (± 0.2) |
| <i>p</i> -SCN-Bn-oxo-DO3A | 98.7 (± 0.1)               | 94.4 (± 5.7) | 53.3 (± 9.2) | 19.9 (± 3.7) | 0.5 (± 0.1)  |
| <i>p</i> -SCN-Bn-PCTA     | 97.2 (± 0.4)               | 91.6 (± 1.7) | 48.1 (± 6.3) | 15.8 (± 5.4) | 0.7 (± 0.4)  |
| Sar-CO <sub>2</sub> H     | 96.8 (± 2.4)               | 97.7 (± 0.7) | 48.6 (±34.6) | 12.9 (±14.8) | 2.2 (± 2.5)  |
| <i>p</i> -SCN-Bn-DTPA     | 74.5 (± 5.5)               | 29.8 (±15.2) | 4.5 (± 0.4)  | 2.7 (± 0.6)  | 1.0 (± 0.2)  |
| CHX-A''-DTPA              | 97.1 (± 0.2)               | 96.2 (± 0.4) | 94.2 (± 0.5) | 74.7 (±16.7) | 36.5 (±20.6) |
| 2B3M-ITC-DTPA             | 97.0 (± 0.3)               | 96.4 (± 0.7) | 94.0 (± 1.7) | 67.3 (± 3.3) | 26.8 (±24.5) |

Table S1: Radiolabeling efficiency (% (±SD) n=3) of each immunoconjugate under increasingly dilute conditions.

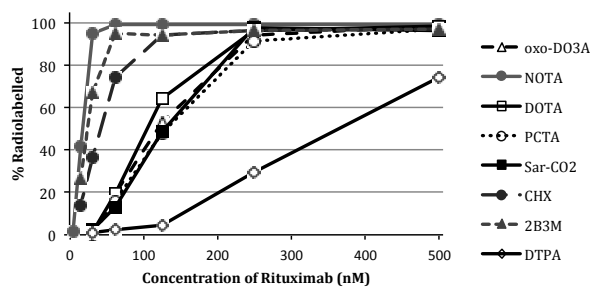

Figure S1: Radiolabeling efficiency of each immunoconjugate under increasingly dilute conditions expressed as concentration of rituximab against % labeling efficiency.

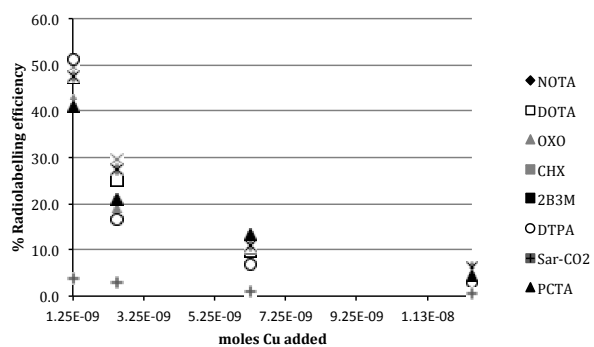

Figure S2: Radiolabeling efficiencies at different copper:immunoconjugate ratios were used to determine the number of bifunctional chelators per antibody molecule. Knowing the moles of Cu added, the number of moles of Cu bound can be calculated from the % radiolabeling efficiency<sup>64</sup>. The moles of Cu bound is divided by the moles of antibody added ( $1.25 \times 10^{-10}$  moles) to give the ligand:antibody ratio. The average ratio across the different concentrations is taken as the number of BFC's per antibody.

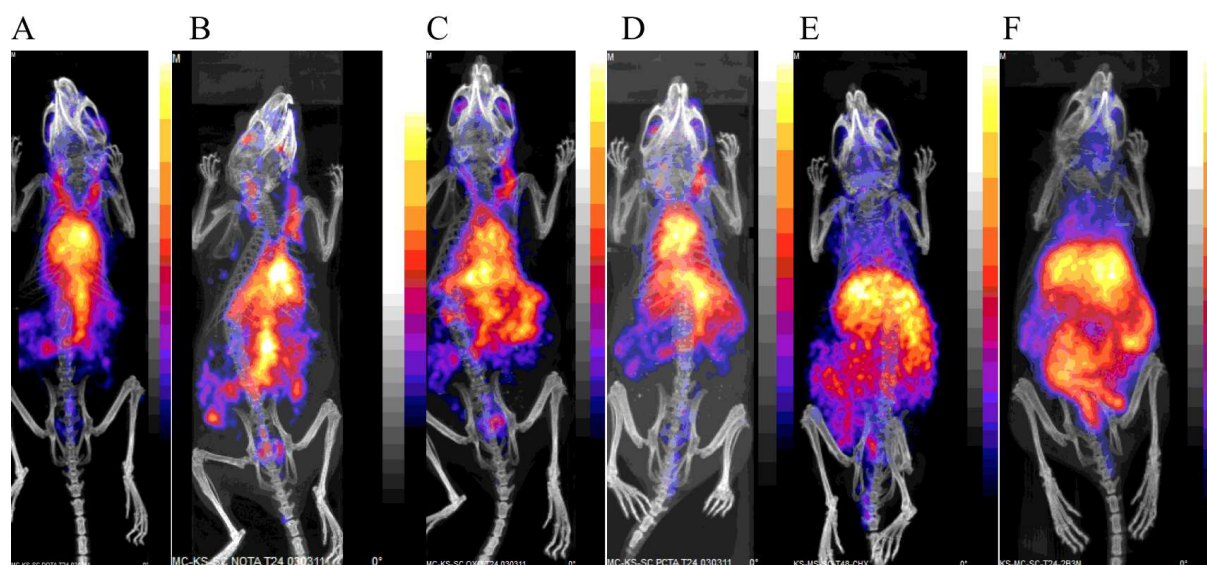

Figure S3: PET images (maximum intensity projection) of Balb/C mice 24 h post injection with  $^{64}\text{Cu}$ -Rituximab-immunoconjugates. (A)  $^{64}\text{Cu}$ -DOTA-Rituximab, (B)  $^{64}\text{Cu}$ -NOTA-Rituximab (C)  $^{64}\text{Cu}$ -oxo-DO3A-Rituximab, (D)  $^{64}\text{Cu}$ -PCTA-Rituximab, (E)  $^{64}\text{Cu}$ -CHX-A''-DTPA-Rituximab and (F)  $^{64}\text{Cu}$ -2B3M-DTPA-Rituximab.

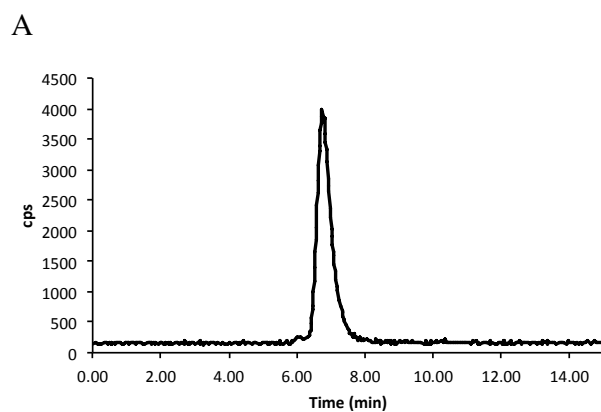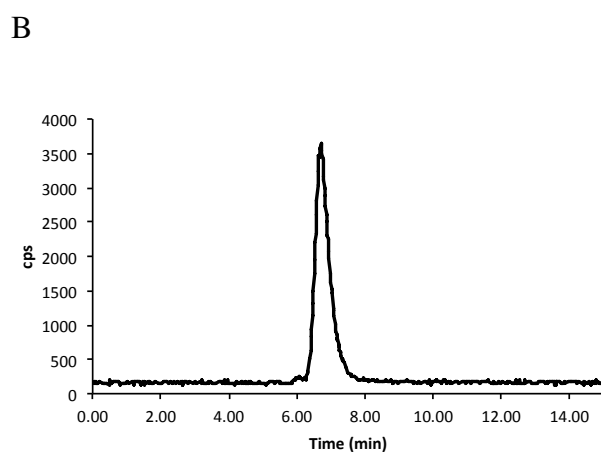

C

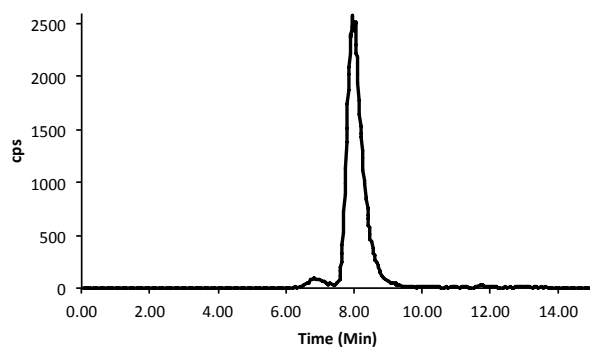

D

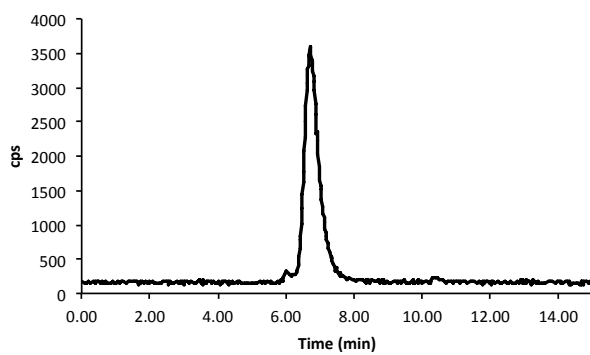

E

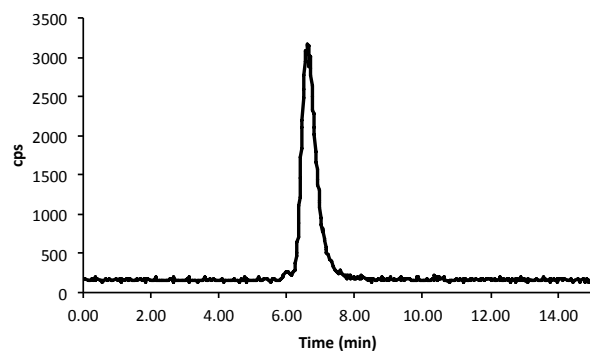

Figure S4: HPLC Radiochromatograms of Cu-64 labeled Rituximab conjugated with different bifunctional chelates (A) *p*-SCN-Bn-oxo-DO3A, (B) *p*-SCN-Bn-DOTA, (C) Sar-CO<sub>2</sub>H, (D) CHX-A''-DTPA, (E) 2B3M-DTPA. The shift in retention time for <sup>64</sup>Cu-Sar-CO-Rituximab compared with the other radioimmunoconjugates is due to the presence of a guard column before the size exclusion column.
